# Supplementary material for: Synthesis of gold nanoparticles within silica monoliths through irradiation techniques using Au(i) and Au(iii) precursors
Source: Royal Society of Chemistry journal article supplement (doi:10.1039/c4ra01315h), 2014-01-01
Supplement: c4ra01315h1.pdf [file c4ra01315h1.pdf]

1 **Synthesis of Gold Nanoparticles within Silica Monoliths through Irradiation Techniques**  
2 **using Au(I) and Au(III) Precursors**

3  
4 *Matteo Tonelli<sup>†‡◊\*</sup>, Sylvia Turrell<sup>‡</sup>, Odile Cristini<sup>†</sup>, Hicham El Hamzaoui<sup>†</sup>, Bruno Capoen<sup>†\*</sup>,*  
5 *Mohamed Bouazaoui<sup>†</sup>, Massimo Gazzano<sup>♦</sup>, Maria Cristina Cassani<sup>◊</sup>*

6  
7 <sup>†</sup>PhLAM (CNRS, UMR 8523) and CERLA, Université Lille 1, Sciences et Technologies 59655 Villeneuve d'Ascq, France

8 <sup>‡</sup>LASIR (CNRS, UMR 8516) and CERLA, Université Lille 1, Sciences et Technologies 59655 Villeneuve d'Ascq, France

9 <sup>\*</sup>ISOF-CNR, c/o Dipartimento di Chimica "G. Ciamician", Università degli Studi di Bologna, Via Selmi 2, I-40126 Bologna, Italy

10 <sup>◊</sup>Dipartimento di Chimica Industriale "Toso Montanari", Università degli Studi di Bologna, Viale Risorgimento 4, I-40136 Bologna, Italy

11 <sup>◊</sup>Present adress: Institut de Recherches sur la Catalyse et l'Environnement de Lyon, IRCELYON, UMR5256 CNRS-Université Claude  
12 Bernard Lyon 1, 2 avenue A. Einstein, F-69626 Villeurbanne cedex, France

13 **Supporting Information**

14

**1-Synthesis of the gold precursors**

**2-XRD data for the Au(I)-doped samples**

**3-Characterization of the precursors and of the doped  
matrices**

- **UV-Vis absorption spectroscopy**
- **Raman spectroscopy**
- **TGA**

15

16

17

## 1 **1-Synthesis of the gold precursors**

### 2 *(Triphenylphosphine) gold chloride.*

3 The synthesis of  $(\text{PPh}_3)\text{AuCl}$  followed a published procedure.<sup>1</sup>

4 In a typical synthesis, 1.50 mmol of  $\text{HAuCl}_4 \cdot 3\text{H}_2\text{O}$  were transferred into a 100 ml round-  
5 bottomed flask and dissolved in 10 ml of ethanol. 3.20 mmol of triphenylphosphine was  
6 added drop-wise to this solution under constant stirring, leading to the immediate formation of  
7  $(\text{PPh}_3)\text{AuCl}$  as a white precipitate. The product was subsequently filtered with a sintered  
8 funnel, washed three times with ethanol and finally dried for several hours under vacuum.

9

### 10 *Tetrabutylammonium tetrachloroaurate.*

11 The synthesis of  $[\text{nBu}_4\text{N}][\text{AuCl}_4]$  followed a published procedure.<sup>2</sup>

12 3.10 mmol of  $\text{HAuCl}_4 \cdot 3\text{H}_2\text{O}$  were dissolved in 40 ml of a 0.1 M HCl solution. Successively  
13 an aqueous solution of tetrabutylammonium chloride was prepared by dissolving 4.00 mmol  
14 of  $[\text{nBu}_4\text{N}]\text{Cl}$ . This latter was added drop-wise leading to the immediate formation of a yellow  
15 precipitate. After stirring for 30 min, the precipitate was filtered on a sintered funnel, washed  
16 first with distilled water, then three times with 10 ml of diethyl ether and finally vacuum dried  
17 for several hours.

18

19

20

21

## 1 2- XRD data for the Au(I)-doped samples

2 Whereas for all Au(III)-doped samples, the collected XRD data showed the typical pattern of  
3 fcc gold with the expected intensities ratios of the reflections, in two cases of irradiation  
4 employing the Au(I) doped matrices (at 266 and 800 nm), the (111) reflections were  
5 overestimated in respect to the others (see Fig. 1S and 2S). No such difference in the  
6 intensities of the reflexions was observed instead for the Au(I)-doped samples irradiated at  
7 532 nm or with the UV mercury vapor lamp (Fig. 3S and 4S respectively).

8

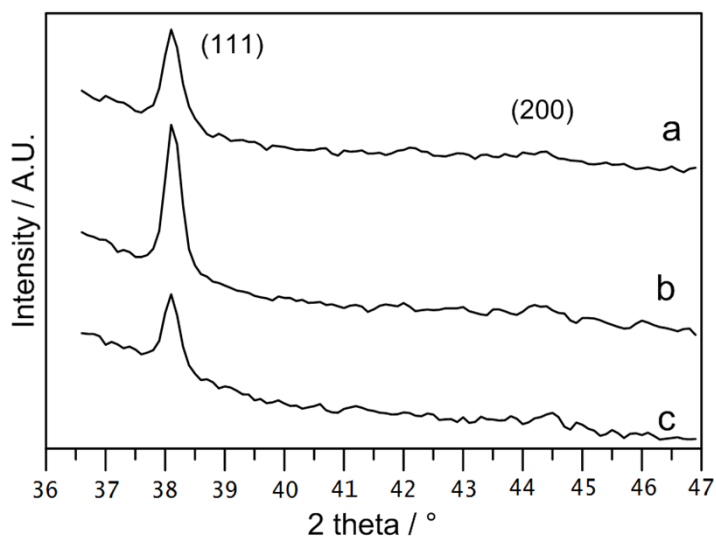

9

10 **Fig. 1S** Enlarged view of the (111) and (200) reflections in the XRD pattern of the Au(I)-  
11 doped samples irradiated at a) 20 mW b) 30 mW and c) 60 mW with the femtosecond pulsed  
12 laser operating at 800 nm.

13

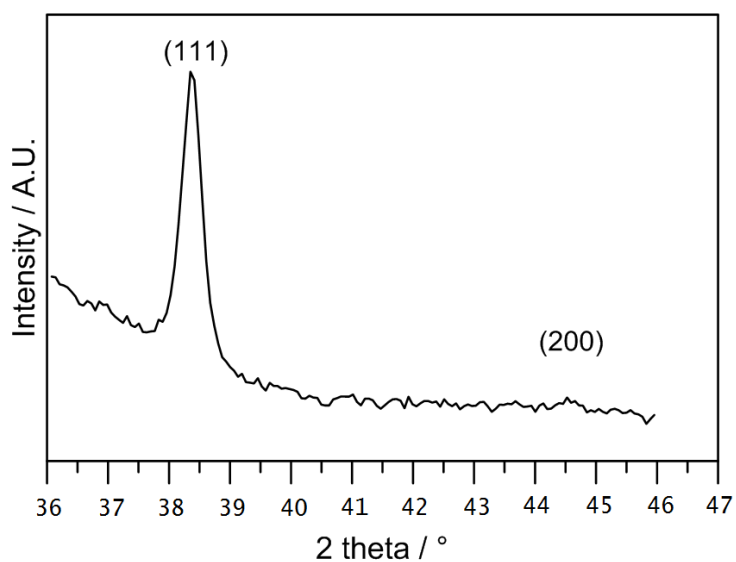

1

2 **Fig. 2S** Enlarged view of the (111) and (200) reflections in the XRD pattern of a Au(I)-doped  
 3 sample after irradiation at 266 nm.

4

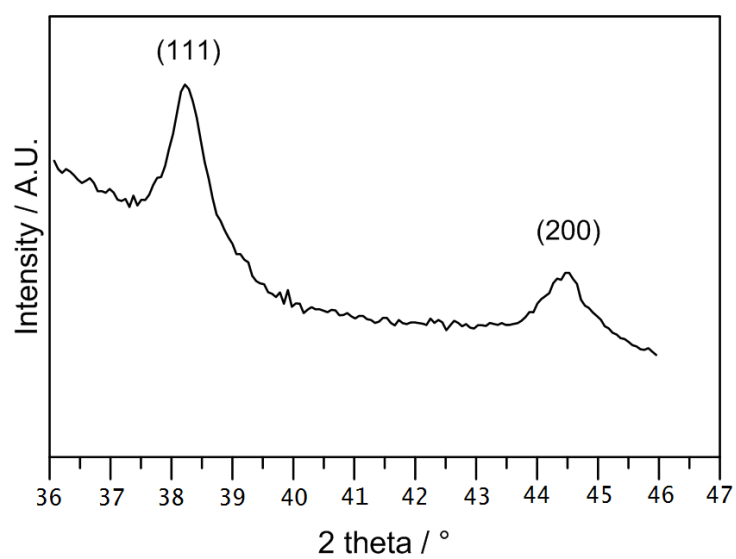

5

6 **Fig. 3S** Enlarged view of the (111) and (200) reflections in the XRD pattern of the Au(I)-  
 7 doped after irradiation at 532 nm.

8

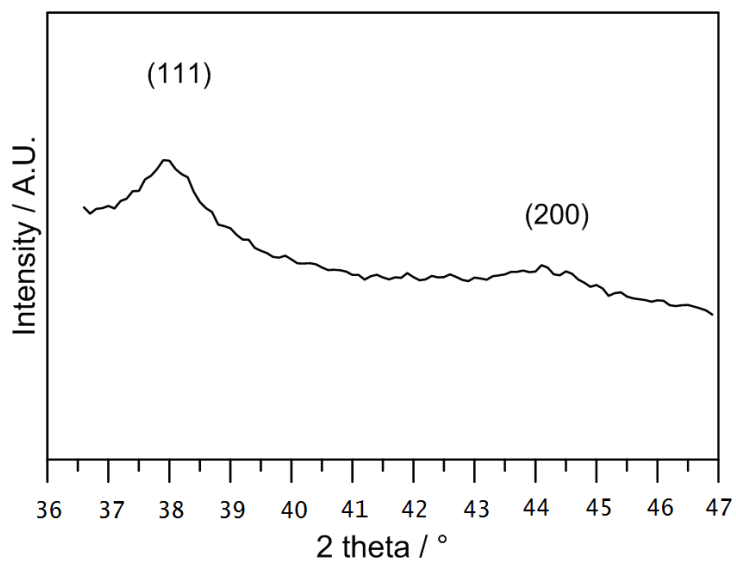

1

2 **Fig. 4S** Enlarged view of the (111) and (200) reflections in the XRD pattern of the Au(I)-  
3 doped sample irradiated with the UV-mercury vapor lamp.

4

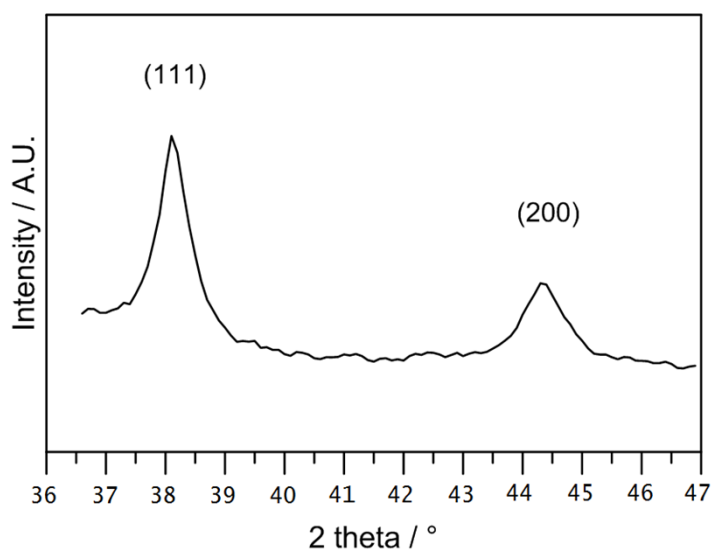

5

6 **Fig. 5S** Enlarged view of the (111) and (200) reflections in the XRD pattern of the Au(III)-  
7 doped sample irradiated with the laser operating at 532 nm.

8

9

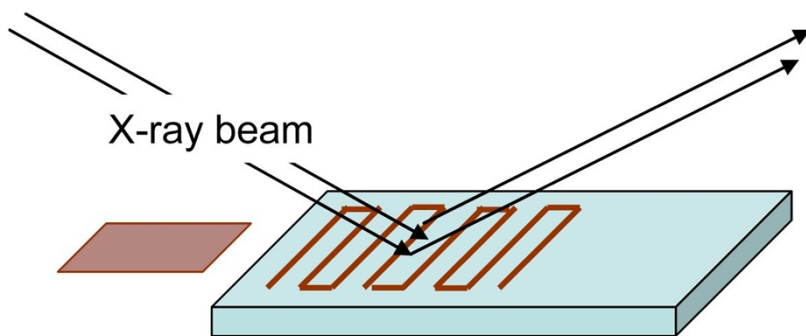

**(111) plane lies parallel to the main surface**

1

2 **Sketch 1.** Representation of the geometry used in XRD data collection. In the samples where  
 3 a preferential orientation was observed, GNPs were grown with the (111) plane lying parallel  
 4 to the main surface of the sample.

5

### 6 3- Characterization of the precursors and of the doped matrices

#### 7 UV-Vis absorption spectroscopy

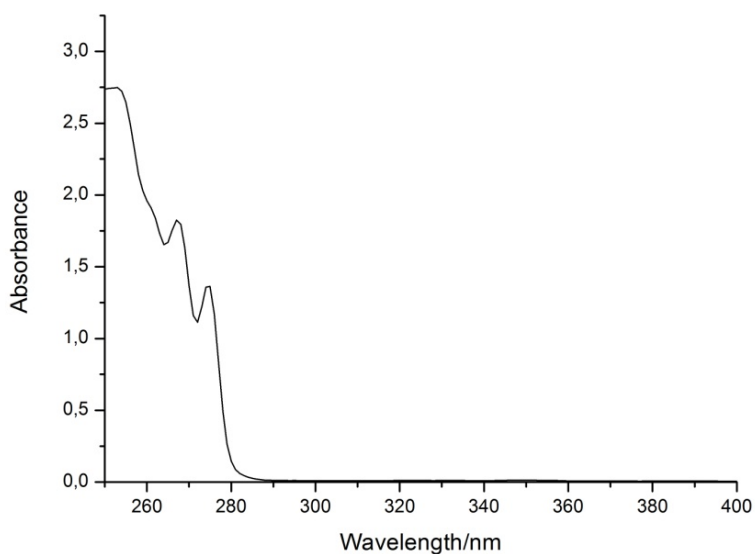

8

9 **Fig. 6S** UV-vis absorption spectrum of a  $2 \cdot 10^{-4}$  M  $(\text{Ph}_3\text{P})\text{AuCl}$  solution in  $\text{CH}_2\text{Cl}_2$ .

1

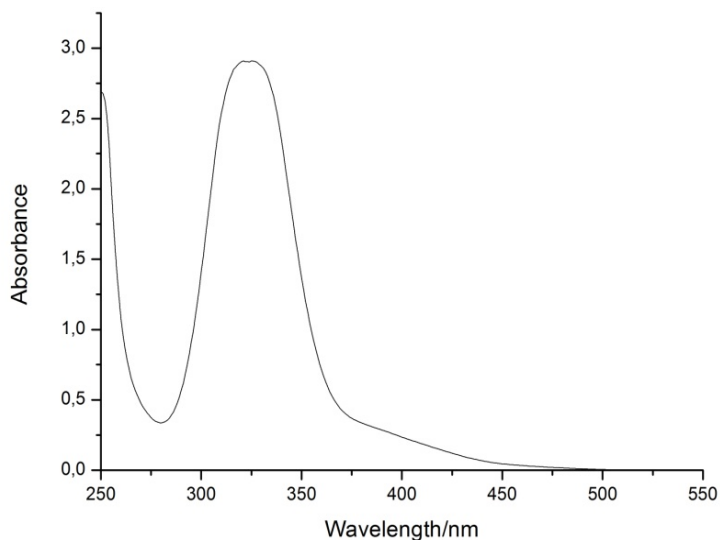

2

3 **Fig. 7S** UV-vis absorption spectrum of a  $4 \cdot 10^{-4}$  M  $[n\text{Bu}_4\text{N}]\text{AuCl}_4$  solution in  $\text{CH}_2\text{Cl}_2$ .

4

#### 5 *Raman spectroscopy*

6 The Raman spectrum characteristic of the silica xerogels used for these experiments is  
7 presented in Fig. 8S. It exhibits the well-known bands mainly dominated by a broad band  
8 around  $430\text{ cm}^{-1}$  assigned to the  $\delta$ -SiOSi network deformation<sup>3</sup>. The defect-mode bands D<sub>1</sub>  
9 and D<sub>2</sub>, observed respectively at  $495$  and  $606\text{ cm}^{-1}$ , are significantly more intense than in  
10 densified silica matrices. This observation, combined with the absence of a low-frequency  
11 band (the Boson Peak), characteristic of a vitreous dense structure, confirm that the silica  
12 matrix is still porous after the final heat treatment at  $850^\circ\text{C}$ .

13

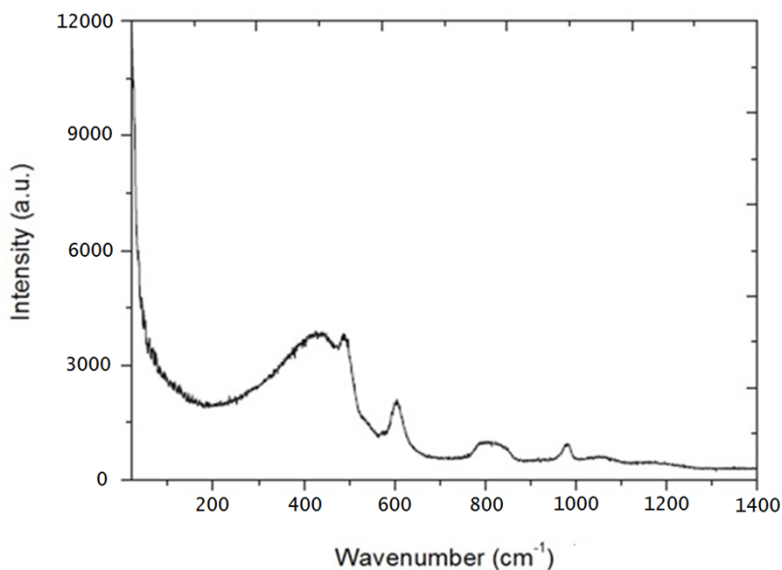

1

2 **Fig. 8S** Raman spectra of the silica xerogel stabilized at 850°C.

3

4 In Fig. 9Sa, the Raman spectrum of the xerogel after impregnation with the Au(I) precursor is  
 5 presented. The three bands characteristic of vibrations of the phenyl ring of [AuCl(Ph<sub>3</sub>P)]  
 6 (Fig. 9Sb) are superposed on the signal of the silica matrix, confirming the presence of the  
 7 precursors within the matrix. The most intense band at 999 cm<sup>-1</sup> has been previously  
 8 assigned<sup>4,5</sup> to the ring breathing of the phenyl group. The band at 1028 cm<sup>-1</sup> corresponds to the  
 9 in-plane bending vibration of the C-H in the phenyl ring and finally the weaker band at 1103  
 10 cm<sup>-1</sup> arises from the stretching of the P-C(Ph) bond<sup>4</sup>.



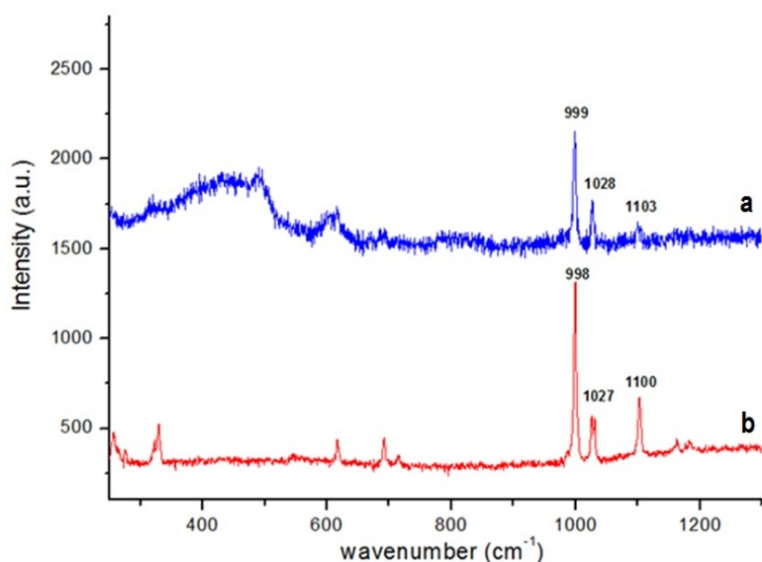

1

2 **Fig. 9S** a) Raman spectrum of the matrix impregnated with the Au(I) precursor b) Raman  
 3 spectrum of (Ph<sub>3</sub>P)AuCl. Experimental conditions:  $\lambda_{\text{exc}} = 632.8 \text{ nm}$ ; Accumulation time: 20 s;  
 4 Number of accumulations: 4.

5

6 The Raman spectrum of [nBu<sub>4</sub>N][AuCl<sub>4</sub>], shown in Fig. 10Sb, is characterized by three bands  
 7 centred at about 340 cm<sup>-1</sup>. The most intense peaks at 323 and 347 cm<sup>-1</sup> are associated with the  
 8  $\nu_2$  (B<sub>1g</sub>) and  $\nu_1$  (A<sub>1g</sub>) vibrations of the square planar [AuCl<sub>4</sub>]<sup>-</sup> ion, respectively<sup>5</sup>. These bands  
 9 are clearly visible in the spectrum of the impregnated sample (Fig. 10Sa) together with the  
 10 signal of the silica matrix, proving that the [nBu<sub>4</sub>N][AuCl<sub>4</sub>] molecules have maintained their  
 11 structure.

12

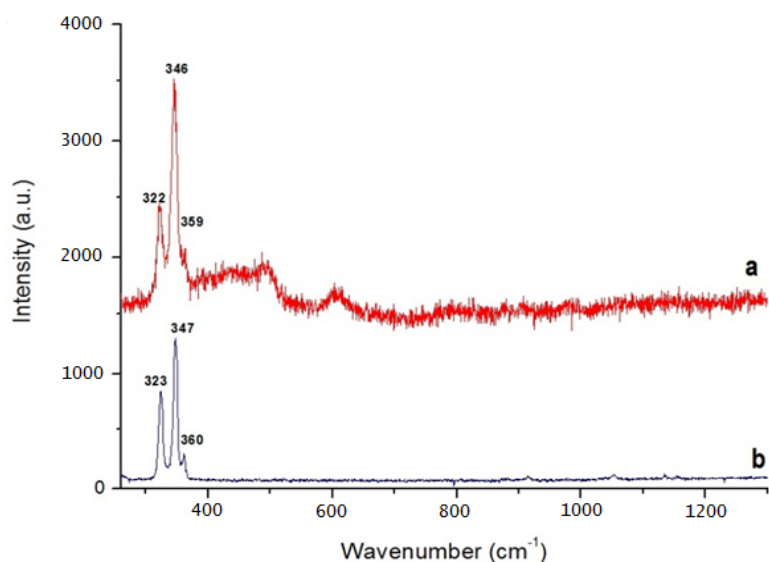

1

2 **Fig. 10S** a) Raman spectrum of the matrix impregnated with the Au(III) precursor b) Raman  
 3 spectrum of [nBu<sub>4</sub>N][AuCl<sub>4</sub>]. Experimental conditions:  $\lambda_{\text{exc}} = 632.8 \text{ nm}$ ; Accumulation time:  
 4 20 s; Number of accumulations: 4.

5

### 6 *Thermal Gravimetric Analysis (TGA)*

7 TGA profiles were collected in air on a SETARAM SETSYS Evolution 18 instrument with a  
 8 heating rate of 10°C/min and making use of platinum crucibles. TGA data indicate that for  
 9 both precursors, the decomposition starts at about 220°C. A mass loss of 57.0 % is observed  
 10 for (Ph<sub>3</sub>P)AuCl at 290°C (see Fig. 11S), which is very close to the calculated value for the  
 11 formation of elemental gold (60.2%).

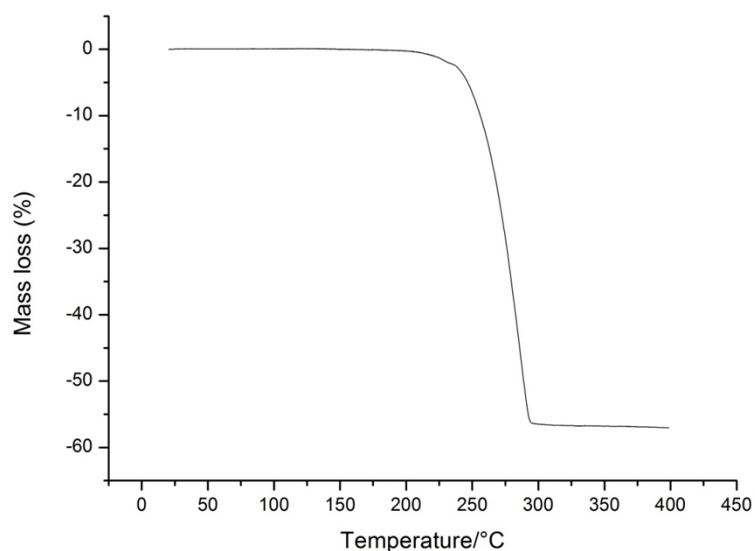

1

2 **Fig. 11S** TGA performed on 7.3 mg of  $(\text{Ph}_3\text{P})\text{AuCl}$ .

3 Also in the case of  $[\text{nBu}_4\text{N}][\text{AuCl}_4]$ , reported in Fig. 12S, it is possible to conclude that the

4 last step of the thermal decomposition leads to elemental gold, as the final mass loss (64.8%)

5 is very close to the calculated value required for gold formation (66.1%).

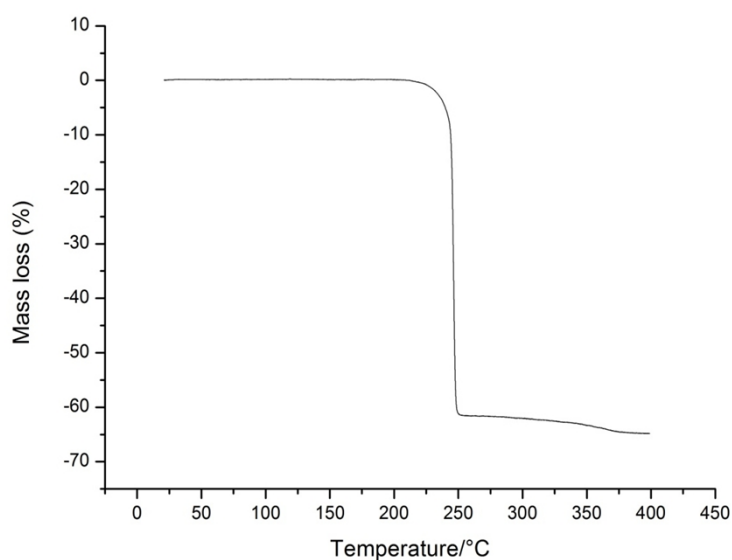

6

7 **Fig. 12S** TGA performed on 4.4 mg of  $[\text{nBu}_4\text{N}][\text{AuCl}_4]$ .

8

9

## 1 References

2 1 N. J. Destefano and J. L. Burmeister, *Inorg. Chem.*, 1971, **10**, 998–1003.

3 2 S. L. Barnholtz, J. D. Lydon, G. Huang, M. Venkatesh, C. L. Barnes, A. R. Ketring and S.

4 S. Jurisson, *Inorg. Chem.*, 2001, **40**, 972–976.

5 3 C. J. Brinker and G. W. Scherer, *Sol-Gel Science: The Physics and Chemistry of Sol-Gel*

6 *Processing*, Gulf Professional Publishing, 1990.

7 4 R. Faggiani, H. E. Howard-Lock, C. J. L. Lock and M. A. Turner, *Can. J. Chem.*, 1987, **65**,

8 1568–1575.

9 5 Y. M. Bosworth and R. J. H. Clark, *Inorg. Chem.*, 1975, **14**, 170–177.
